# Supplementary figures and images for: Visualization of Cell Membrane Tension Regulated by the Microfilaments as a “Shock Absorber” in Micropatterned Cells
Source: MDPI journal article supplement (doi:10.3390/biology12060889), 2023-06-20

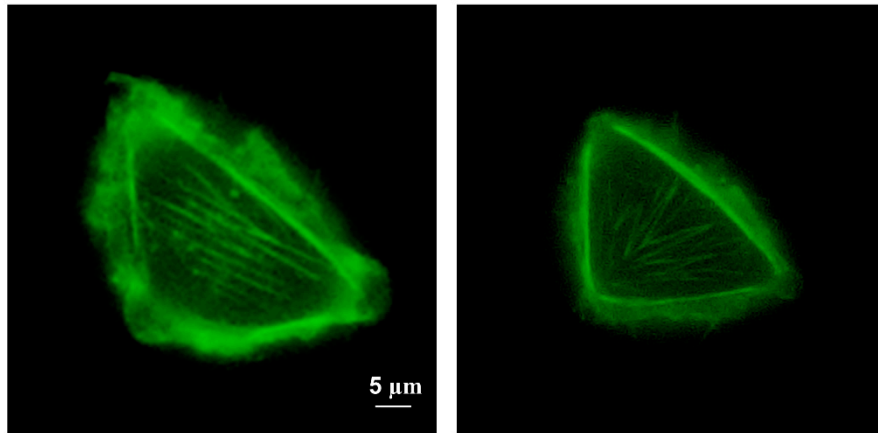

Figure S1. The staining images of cytoskeletal actin in triangle cells.

Supplement: s1 [file s1]
